# Supplementary material
Source: PubMed Central journal article supplement (PMC1955729)
Supplement: plntcell_tpc.106.047779_1.pdf [file plntcell_tpc.106.047779_1.pdf]

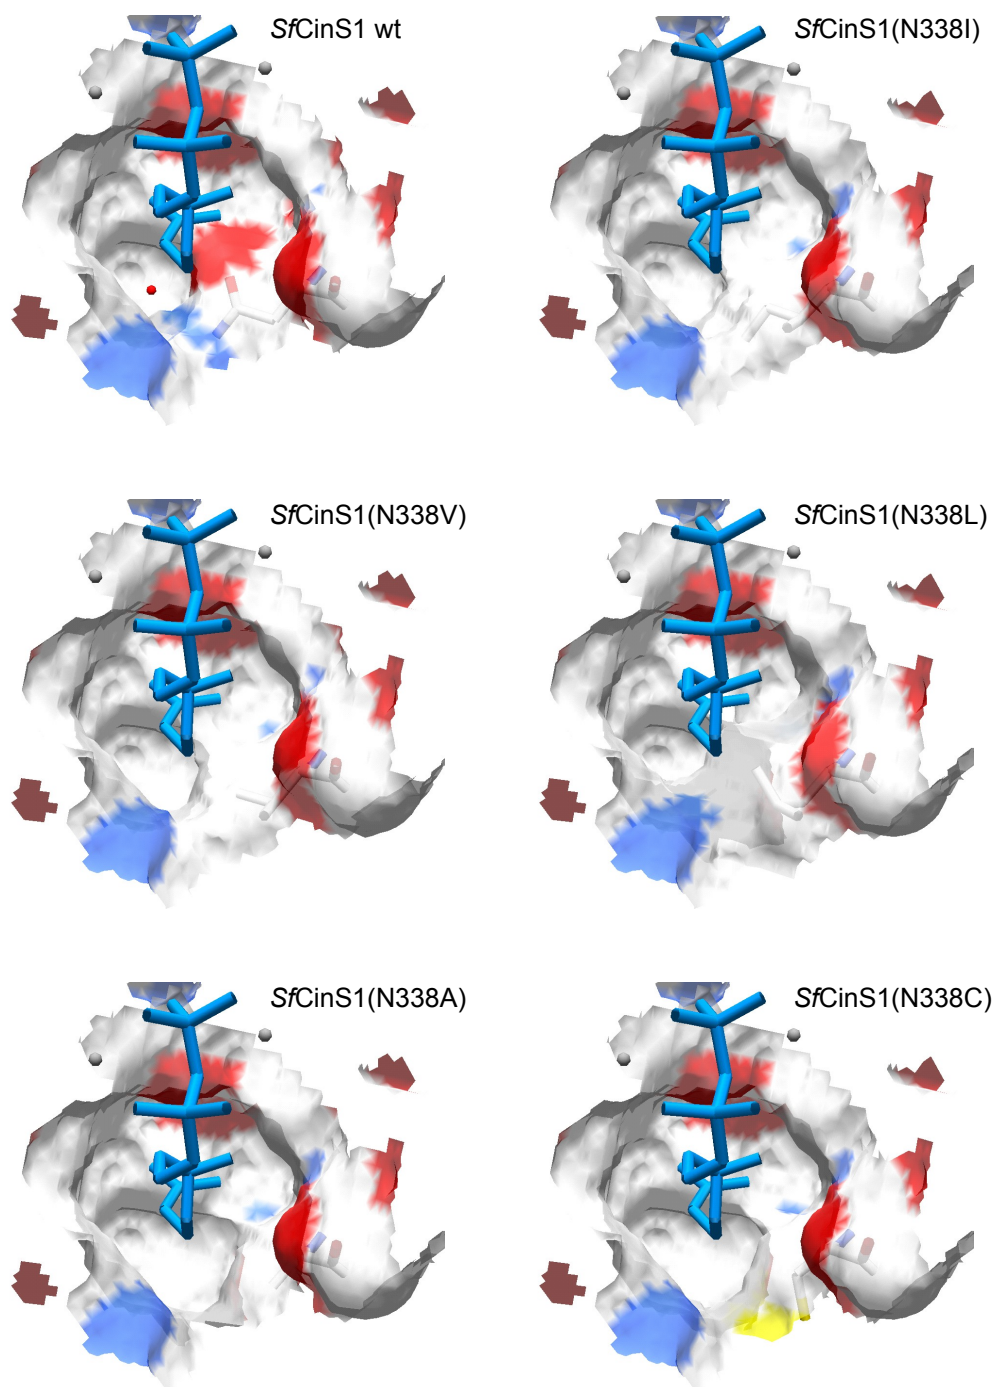

**Supplemental Figure 1 online. Molecular model of the active site of some *SfCinS1* mutants.** Molecular models were constructed in DeepView and the residues in a 6 Å radius of the mutated side-chain were energy minimised using the GROMOS96 forcefield as this is implemented in DeepView. The 3-aza-2,3-dihydrogeranyl diphosphate ligand of the *SoBPPS* structure (PDB: 1N23) is superimposed.
