# Supplementary material
Source: PubMed Central journal article supplement (PMC1955729)
Supplement: plntcell_tpc.106.047779_2.pdf [file plntcell_tpc.106.047779_2.pdf]

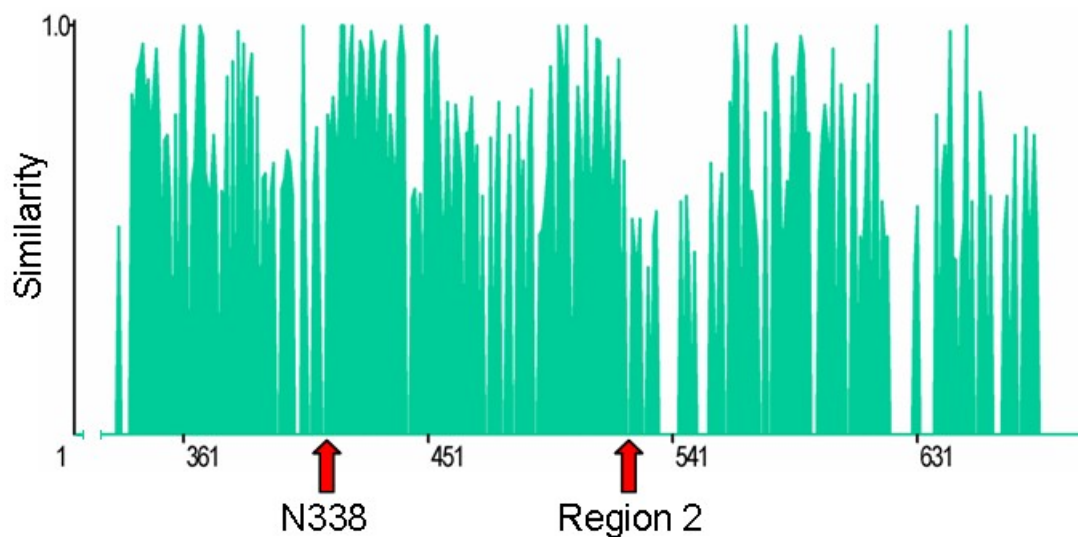

**Supplemental Figure 2 online. Plot of amino acid similarity across the C-terminal domain of an alignment of 46 monoterpene synthases.** Both N338 and region 2 fall into local similarity minima. Other minima coincide with either exposed loop regions or gaps in the amino acid alignment. Alignment and analysis of similarity were performed using the AlignX program of Vector NTI suite (Informax, Inc.).
